# Supplementary material for: Are flood-driven turbidity currents hot-spots for priming effect in lakes?
Source: Copernicus journal article supplement (doi:10.5194/bg-2015-645), 2016-01-18
Supplement: Supplementary file 1 [file bg-2015-645-supplement.pdf]

## Appendix

A1. CTD profiles

A2. CTD transect from the Rhône mouth to the lake centre. These series of CTD profiles suggest that the net O<sub>2</sub> effect of the Rhône intrusion is limited or null but instead efficiently homogenized the O<sub>2</sub> in the hypolimnetic water affected by the intrusion (reduction of the O<sub>2</sub> gradient close to the Rhône River). Intrusion are associated with elevated Tu signal.

A3. Sediment rating curve of the Rhône River at La Porte-du-Scex from 1964 to 2015. Best fit Concentration [mg L<sup>-1</sup>] = aQ<sup>b</sup>, with Q = discharge [m<sup>3</sup> s<sup>-1</sup>], yields a = 5.7 x 10<sup>-4</sup> (3.1 x 10<sup>-4</sup>, 8.3 x 10<sup>-4</sup>) and b = 2.365 (2.29, 2.441) with the 95% confidence interval in parenthesis.

A4. GPS coordinate (geodetic datum CH1903+) of the CTD profiles carried out on May 7<sup>th</sup> 2015

## Appendix

A1.

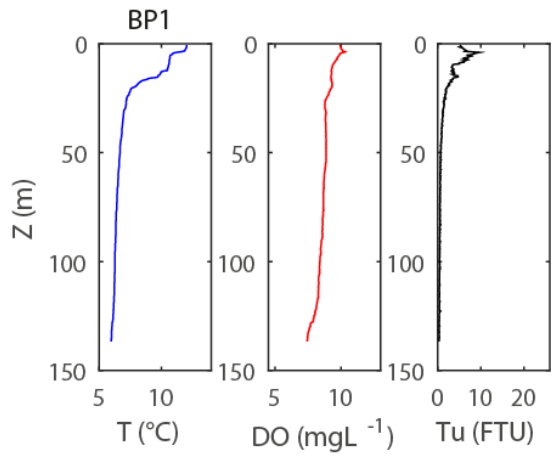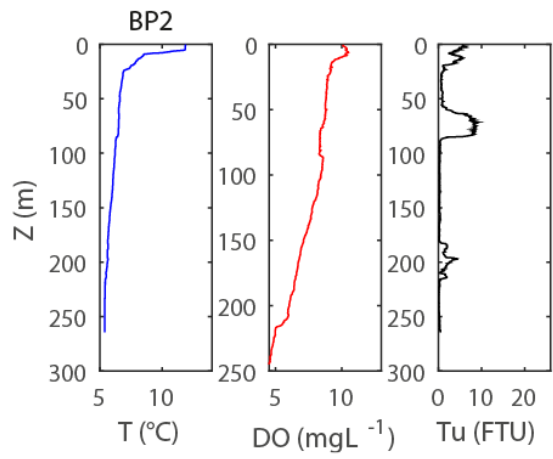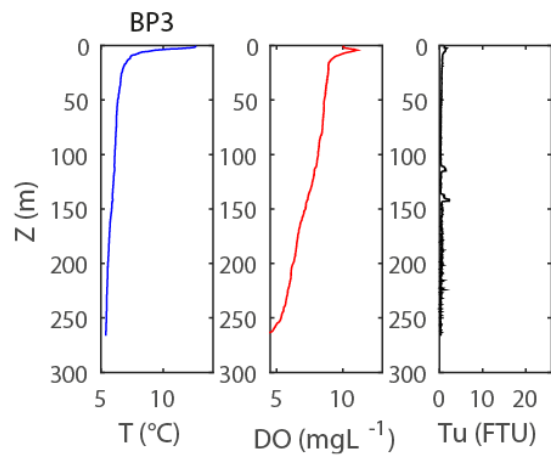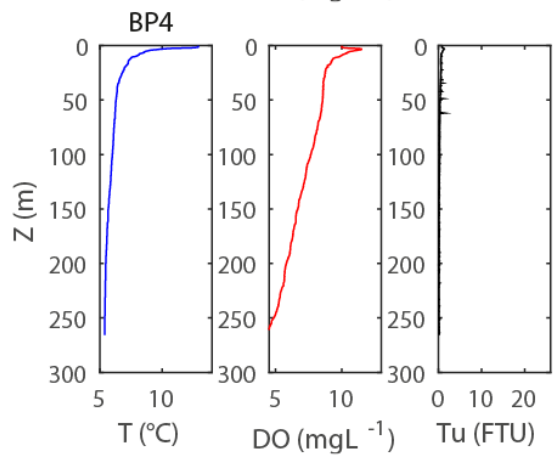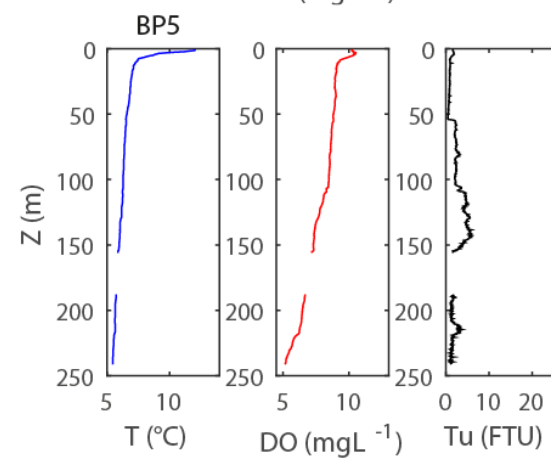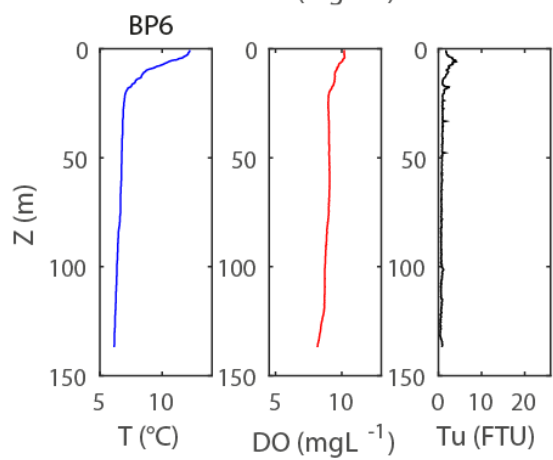

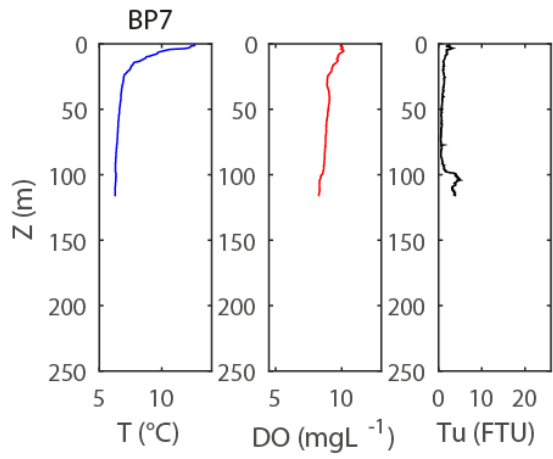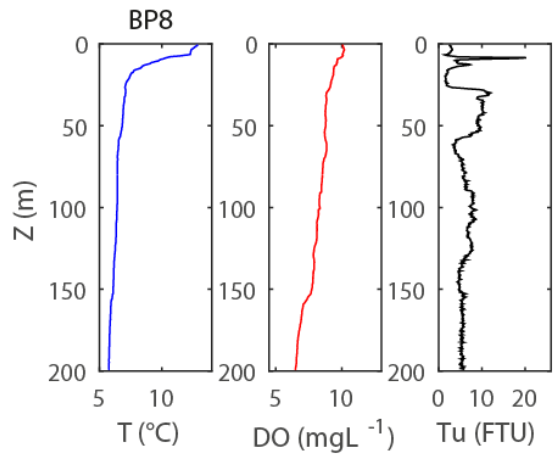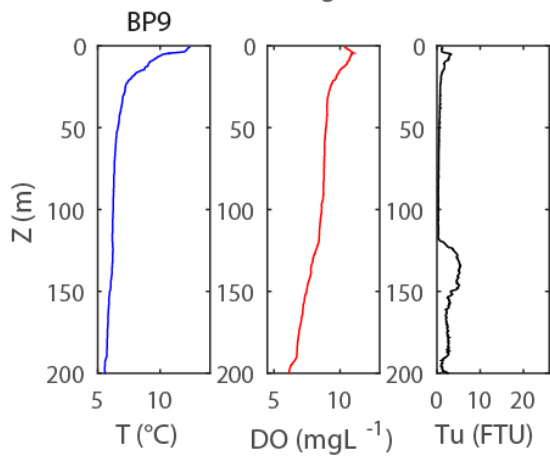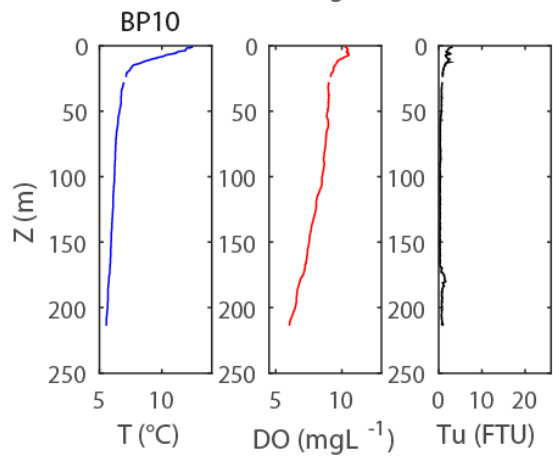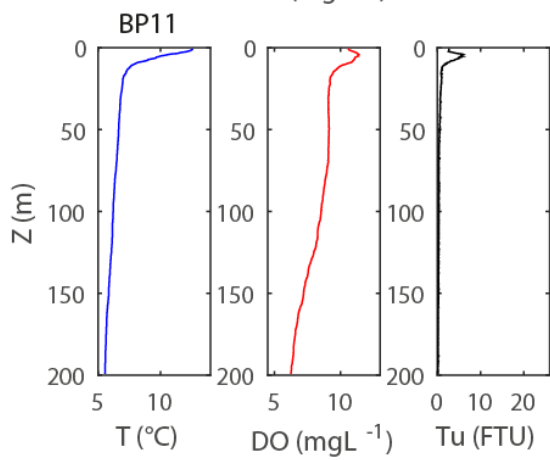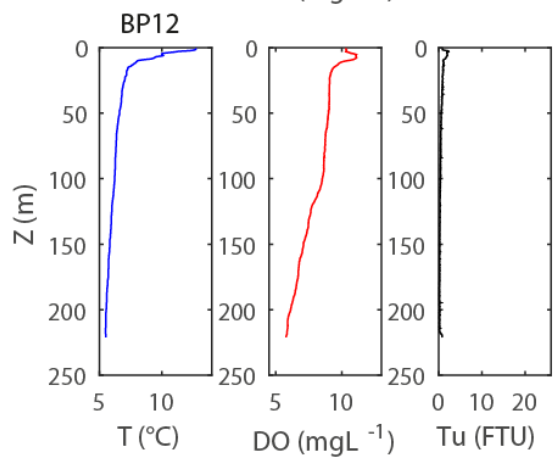

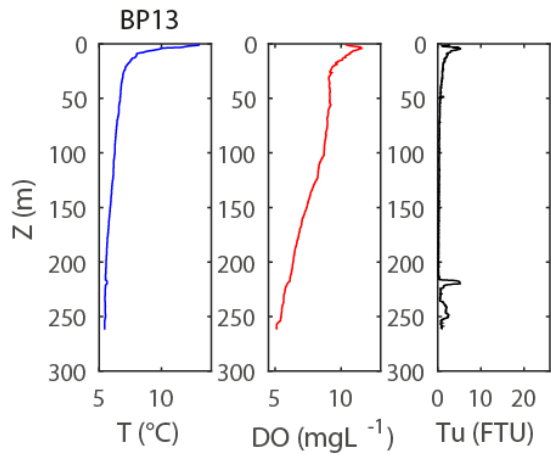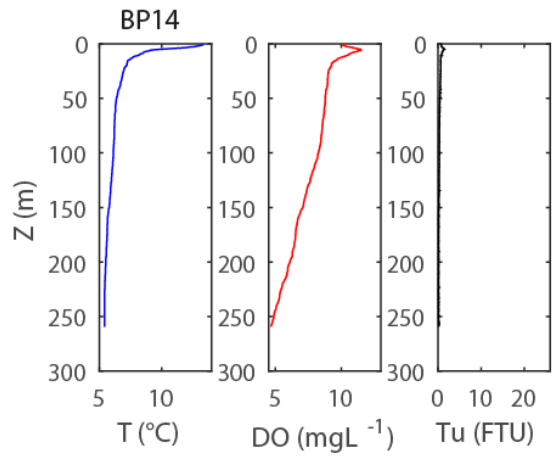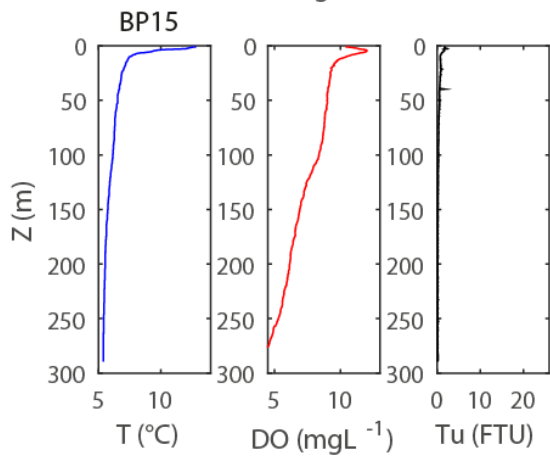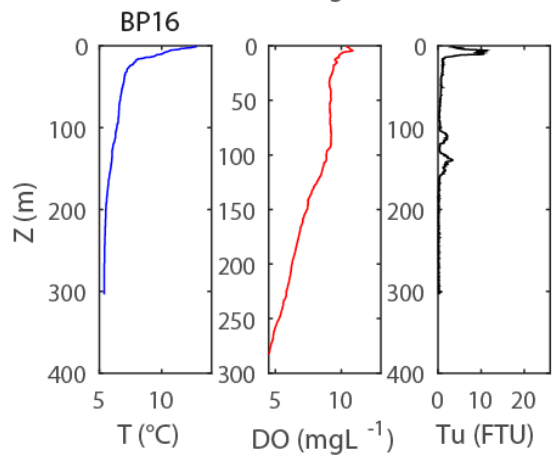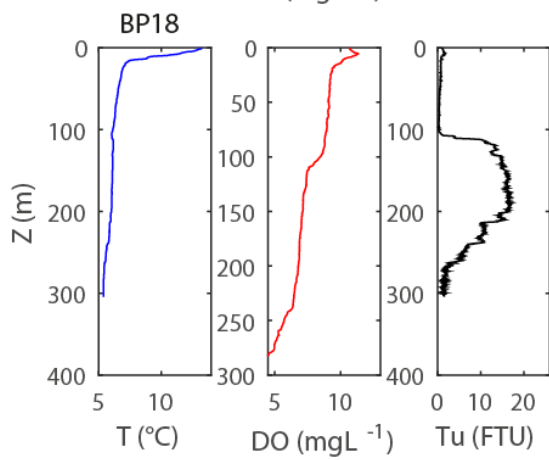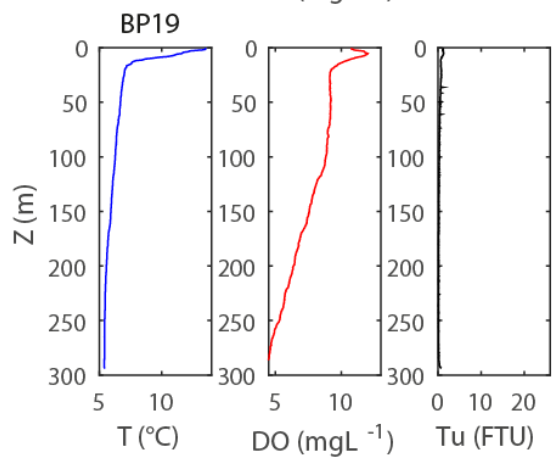

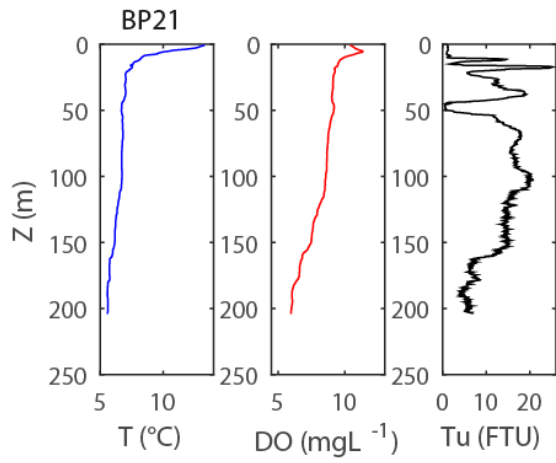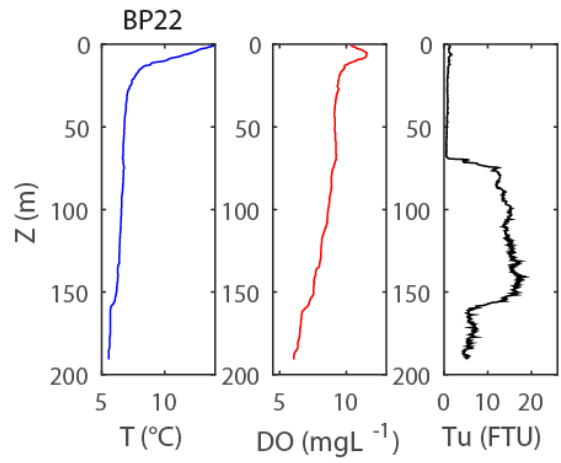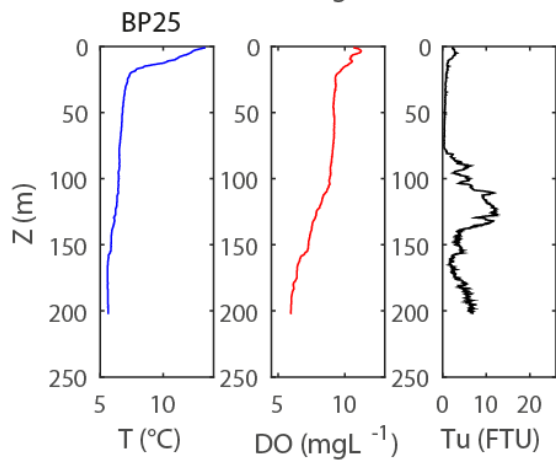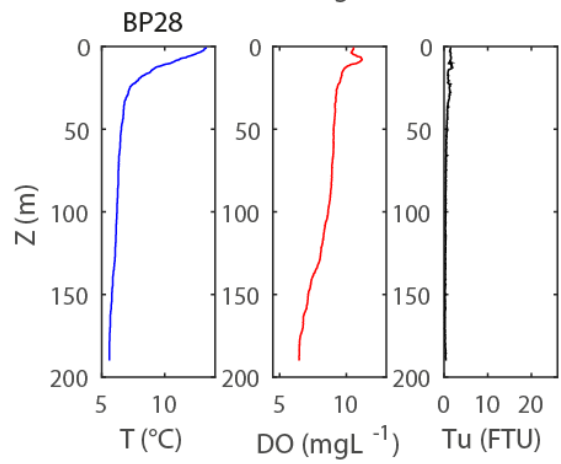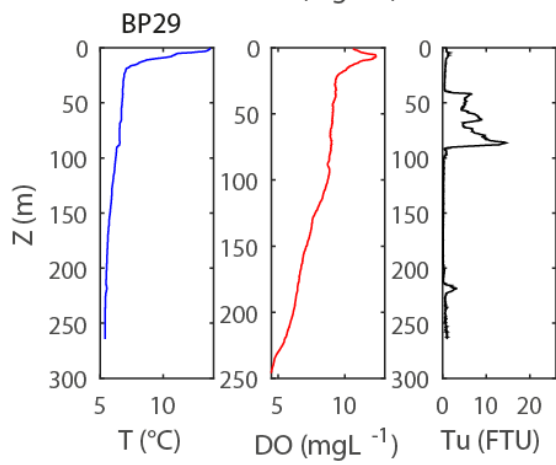

A2.

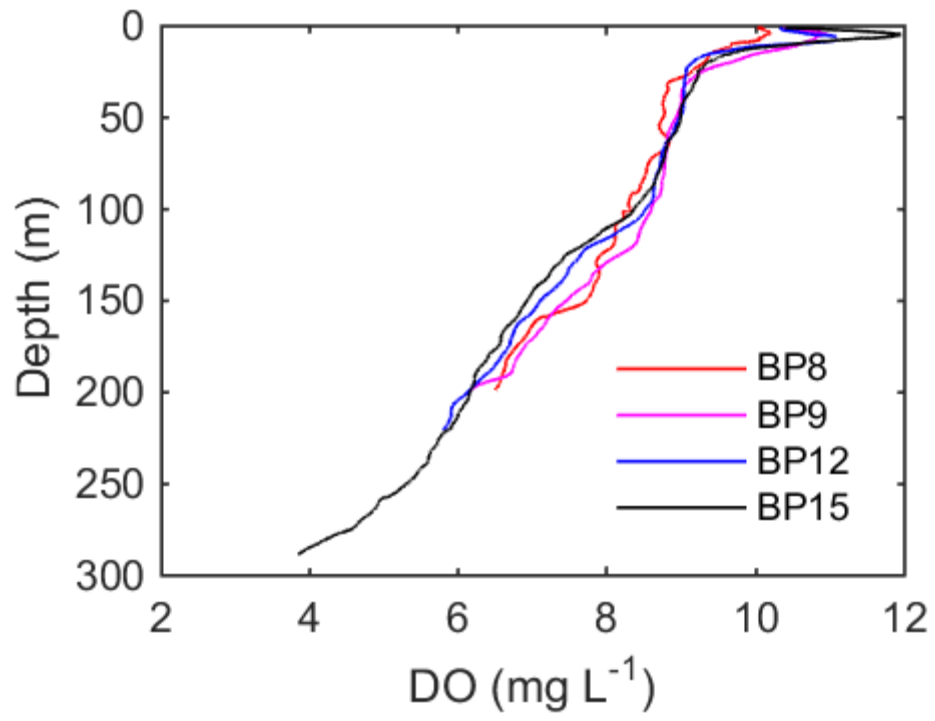

A3.

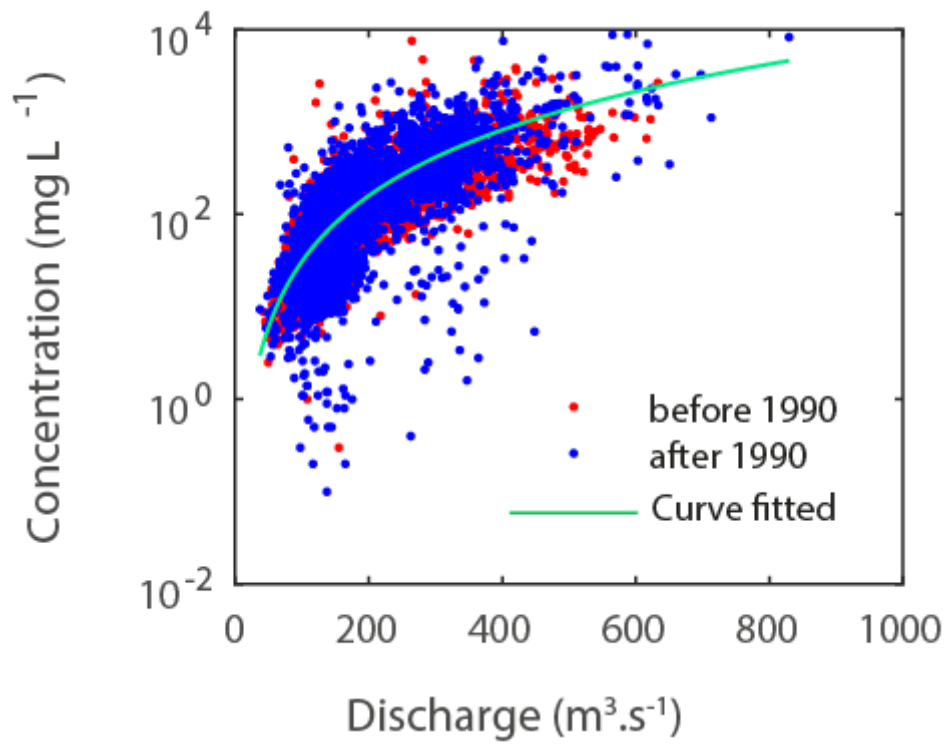

A4.

|      |        |        |
|------|--------|--------|
| BP1  | 539852 | 148149 |
| BP2  | 546865 | 146980 |
| BP3  | 546130 | 145135 |
| BP4  | 545300 | 143805 |
| BP5  | 548235 | 143210 |
| BP6  | 552530 | 141959 |
| BP7  | 550715 | 141620 |
| BP8  | 551700 | 139970 |
| BP9  | 550005 | 140470 |
| BP10 | 549005 | 139620 |
| BP11 | 547105 | 140800 |
| BP12 | 547745 | 141800 |
| BP13 | 545035 | 140800 |
| BP14 | 545565 | 142395 |
| BP15 | 542500 | 143400 |
| BP16 | 538714 | 144815 |
| BP18 | 534700 | 144950 |
| BP19 | 531138 | 142474 |
| BP21 | 530889 | 140513 |
| BP22 | 529829 | 140498 |
| BP25 | 529014 | 140688 |
| BP28 | 525772 | 144919 |
| BP29 | 532112 | 146469 |
| BP30 | 536069 | 149236 |
